# Supplementary material for: Electrochemical Analysis of Attoliter Water Droplets in Organic Solutions through Partitioning Equilibrium
Source: MDPI journal article supplement (doi:10.3390/s23042157), 2023-02-14
Supplement: s1 [file s1]

# Supporting Information

## Electrochemical analysis of attoliter water droplets through organic solution by partitioning equilibrium

*Hyeongkwon Moon and Jun Hui Park\**

Department of Chemistry, Chungbuk National University, Cheongju 28644, Republic of Korea

### AUTHOR INFORMATION

#### Corresponding Author

E-mail: [JHP@chungbuk.ac.kr](mailto:JHP@chungbuk.ac.kr); Tel: +82-43-261-2287; Fax: +82-43-267-2279

### Table of Contents

|                                                                             |    |
|-----------------------------------------------------------------------------|----|
| 1. Electrochemical data for determining concentration of 4-aminophenol..... | S1 |
| 2. Additional i-t curve data of collision events of water droplet.....      | S2 |

3.  $i$ - $t$  curve data with an injection of water droplets during chronoamperometry.....S3

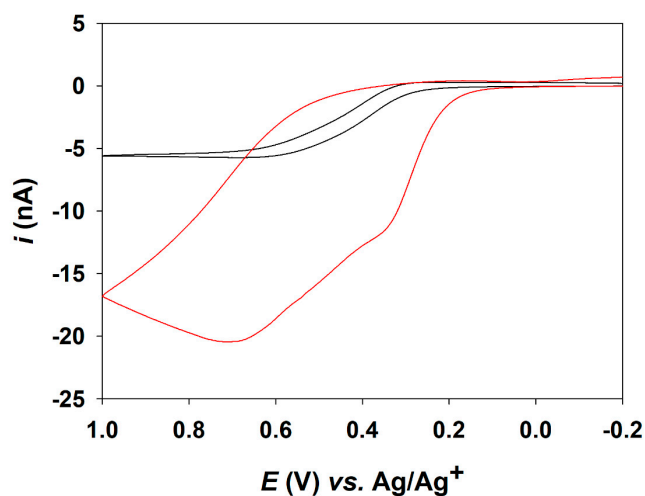

**Figure S1.** Cyclic voltammetry of 1 mM AP in DCE solution containing 100 mM TBAPF<sub>6</sub> (black) and AP saturated DCE solution containing 100 mM TBAPF<sub>6</sub> (red). Saturated concentration of AP in DCE solution was estimated using Eq. S1.

$$i_{lim} = 4nD_{AP}r_{UME}C_{AP} \quad (S1)$$

Here,  $i_{lim}$  is limiting current,  $n$  is the number of electrons in the redox reaction,  $D_{AP}$  is diffusion coefficient of AP,  $r_{UME}$  is the radius of Pt-UME, and  $C_{AP}$  is concentration of AP. The calculated saturated concentration of AP in DCE solution was ca. 3.64 mM at 25°C.

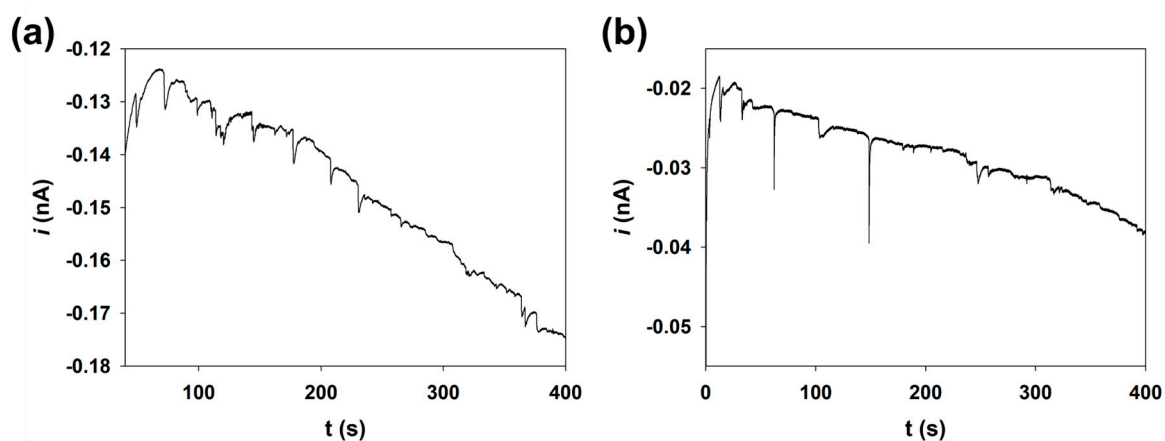

**Figure S2** (a), (b)  $i$ - $t$  curves measured for monitoring the collision of the single water droplets (100 mM  $\text{MgSO}_4$ ) using 25  $\mu\text{m}$  Pt UME at +0.6 V vs.  $\text{Ag}/\text{Ag}^+$  in DCE containing 3 mM AP.

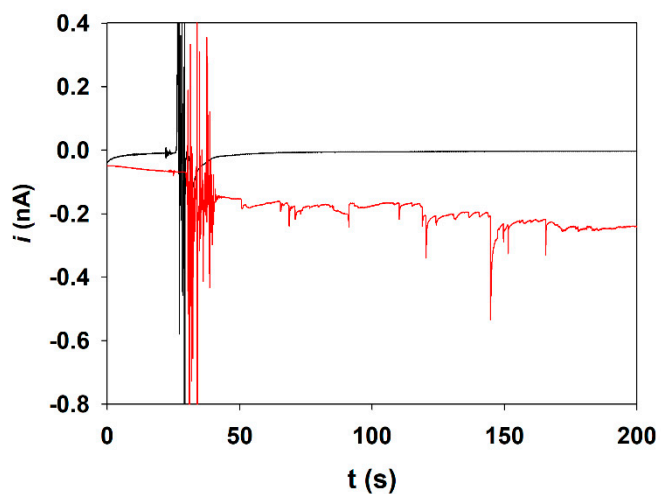

**Figure S3.** Amperometric  $i$ - $t$  curve recorded using 25  $\mu\text{m}$  Pt-UME when water droplets were injected at 30s into the the pure DCE solution (black) and DCE solution containing 3 mM AP (red). The large noise signal at 30 s were caused by the injection process of water droplets (e.g., opening of the Faraday cage).
